# Supplementary material for: The Expression of the Endogenous mTORC1 Inhibitor Sestrin 2 Is Induced by UVB and Balanced with the Expression Level of Sestrin 1
Source: PubMed Central journal article supplement (PMC5115827; doi:10.1371/journal.pone.0166832), 2016-11-18

**A**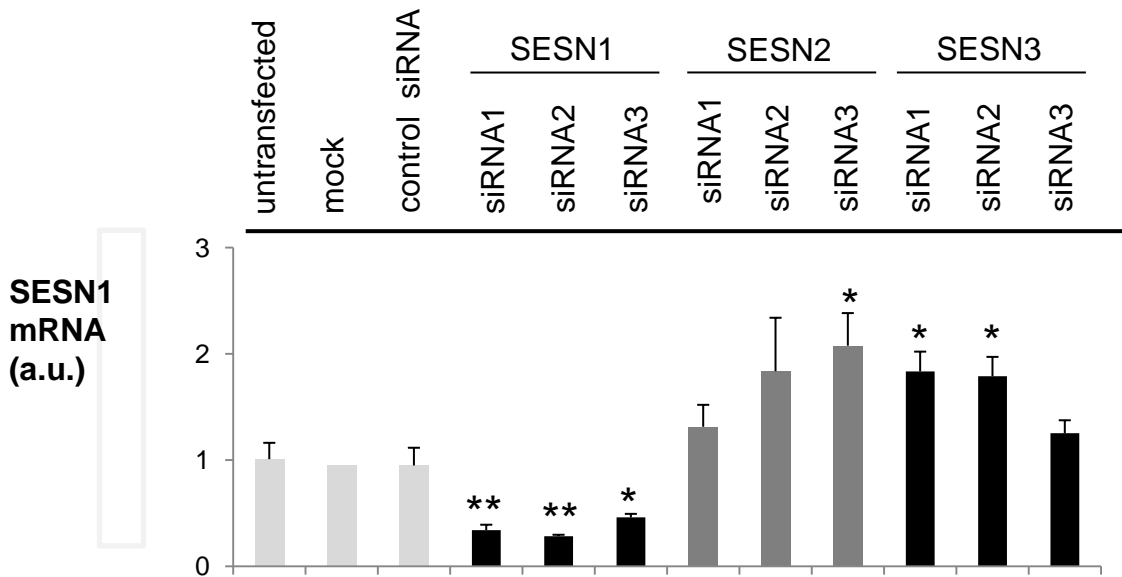**B**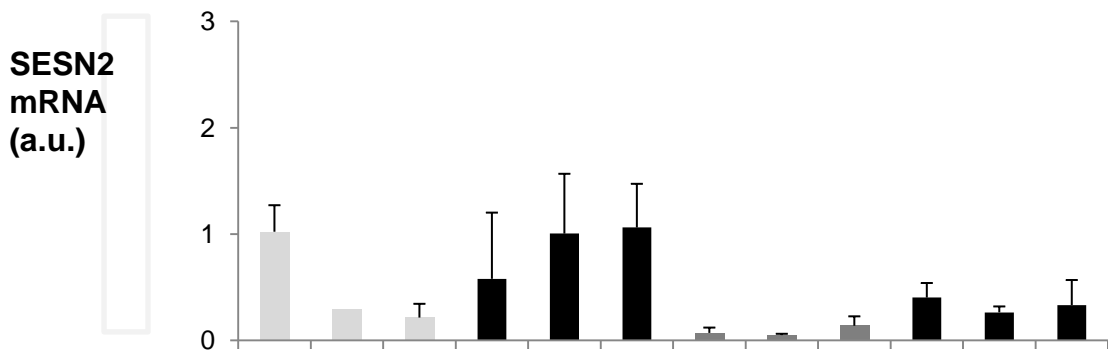**C**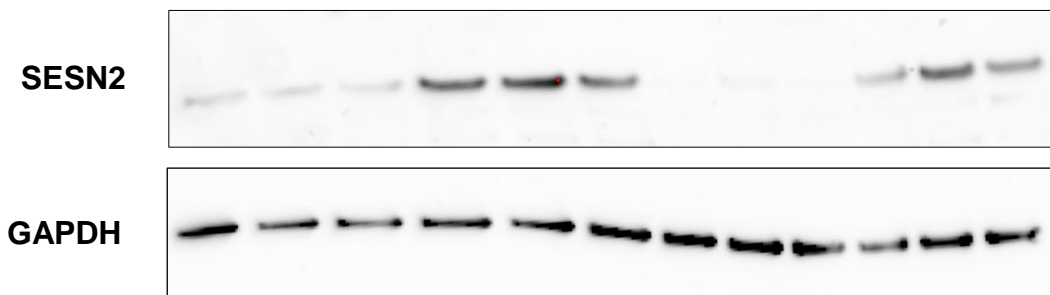

Supplement: pone.0166832.s001.pdf [file pone.0166832.s001.pdf]
